# Supplementary material for: Tumor Necrosis Factor Receptor-associated Factor 6 (TRAF6) Associates with Huntingtin Protein and Promotes Its Atypical Ubiquitination to Enhance Aggregate Formation
Source: PubMed Central journal article supplement — J Biol Chem. 2011 Mar 25;286(28):25108–17. doi: 10.1074/jbc.M110.187591 (PMC3137084; doi:10.1074/jbc.m110.187591), 2011-03-25

### **Supplementary Figure Legend**

**Fig. S1** TRAF6 does not alter Nhtt protein levels. HEK 293 cells were transfected with Nhtt-GFP Q21, Q60 or Q150 with HA-ubiquitin and FLAG-TRAF6 (wt or DN) as indicated. Total protein extracts were prepared in 2X SDS sample buffer. Steady state levels of Nhtt proteins were analyzed by western blot with anti-GFP, anti-HA and anti-FLAG antibodies. Quantity of loaded proteins was verified with anti-beta-actin. Results are representative of three independent experiments.

**Fig. S2** Overexpression of Nhtt does not alter TRAF6 E3 ligase activity. HEK 293 cells were transfected with Nhtt-GFP Q21, Q60 or Q150 with HA-ubiquitin and FLAG-TRAF6 as indicated. E3 ligase activity was monitored by auto-ubiquitination. Lysates were immunoprecipitated with anti-FLAG antibody and ubiquitinated TRAF6 was revealed with anti-HA. Input lysates were analyzed with anti-HA, anti-FLAG and anti-GFP. Molecular weight markers (kDa) are indicated on the left.

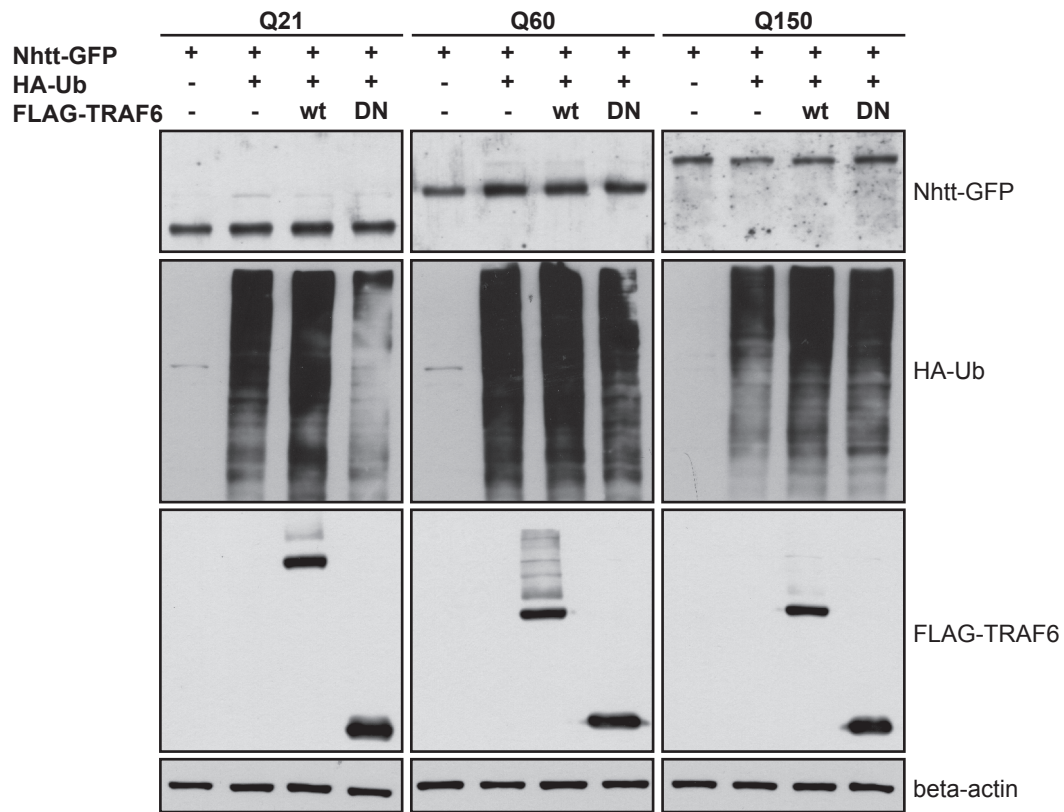

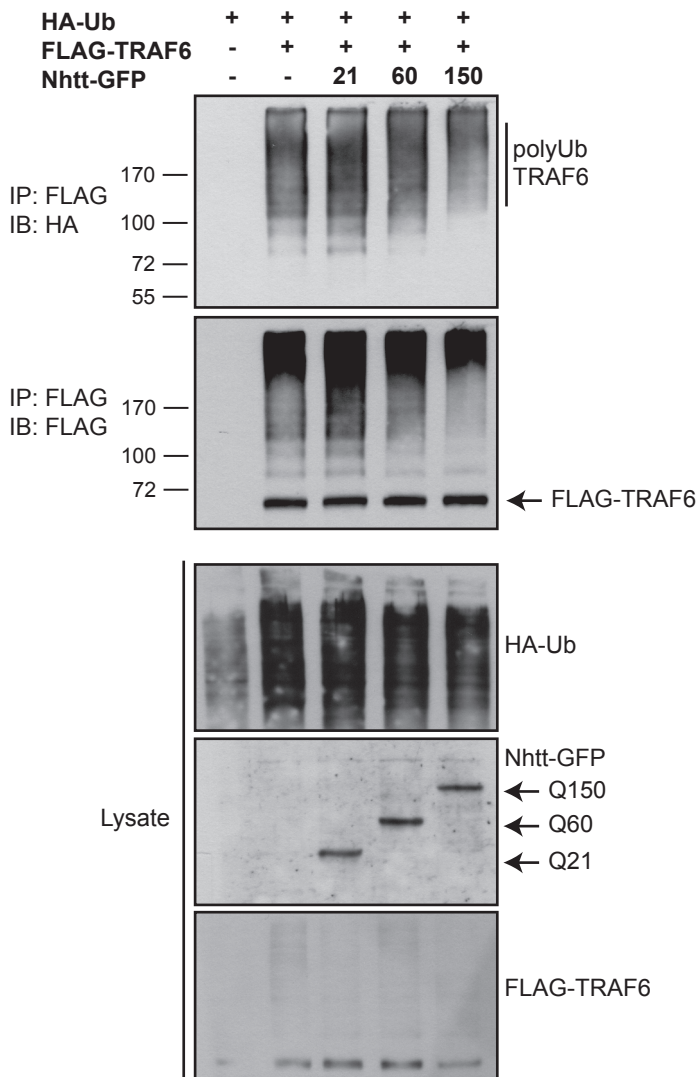

Supplement: supp_M110.187591_jbc.M110.187591-1.pdf [file supp_M110.187591_jbc.M110.187591-1.pdf]
